# Supplementary material
Source: Springer Nature journal article supplement (https://www.springermedizin.de/resource/supplementary/12889_2012_4177_MOESM3_ESM.pdf/9491862)

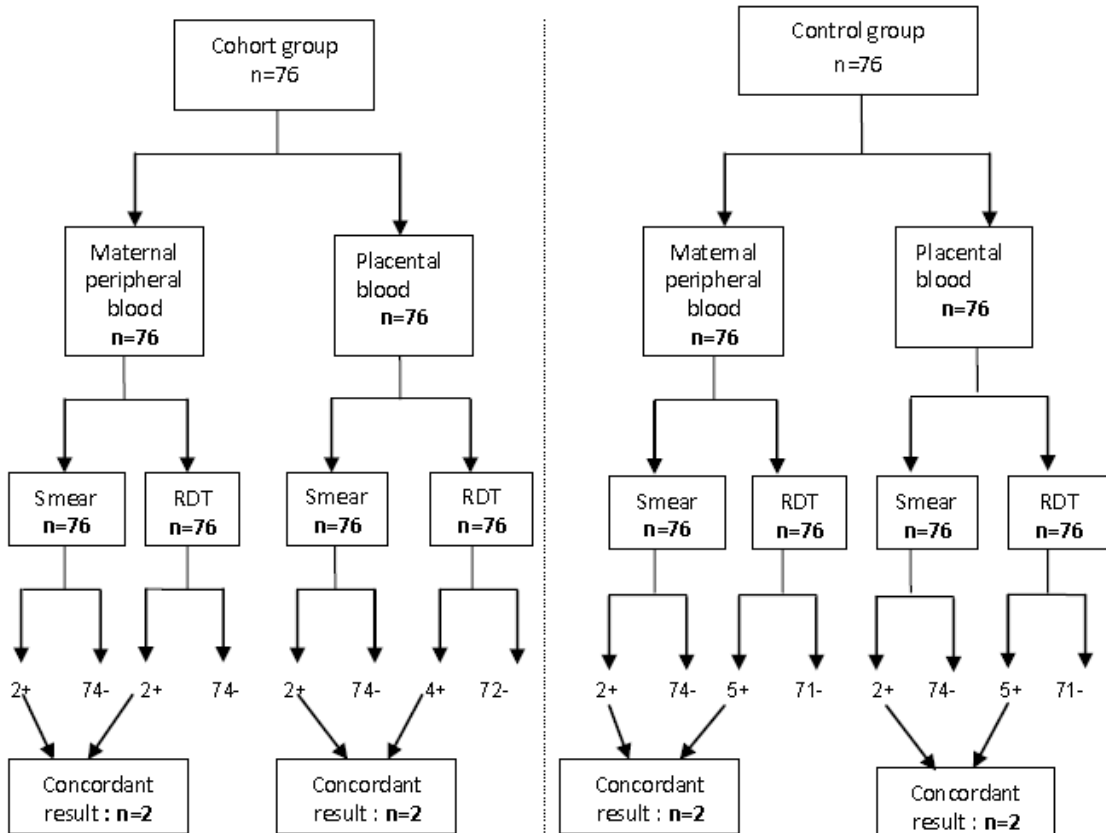

Supplement: MOESM3 [file 9491862]
